# Supplementary material for: Retinoic acid receptor γ is a therapeutically targetable driver of growth and survival in prostate cancer
Source: PubMed Central journal article supplement — Cancer Rep (Hoboken). 2020 Sep 3;3(6):e1284. doi: 10.1002/cnr2.1284 (PMC7941583; doi:10.1002/cnr2.1284), 2020-09-03
Supplement: CNR2-3-e1284-s001.pdf [file CNR2-3-e1284-s001.pdf]

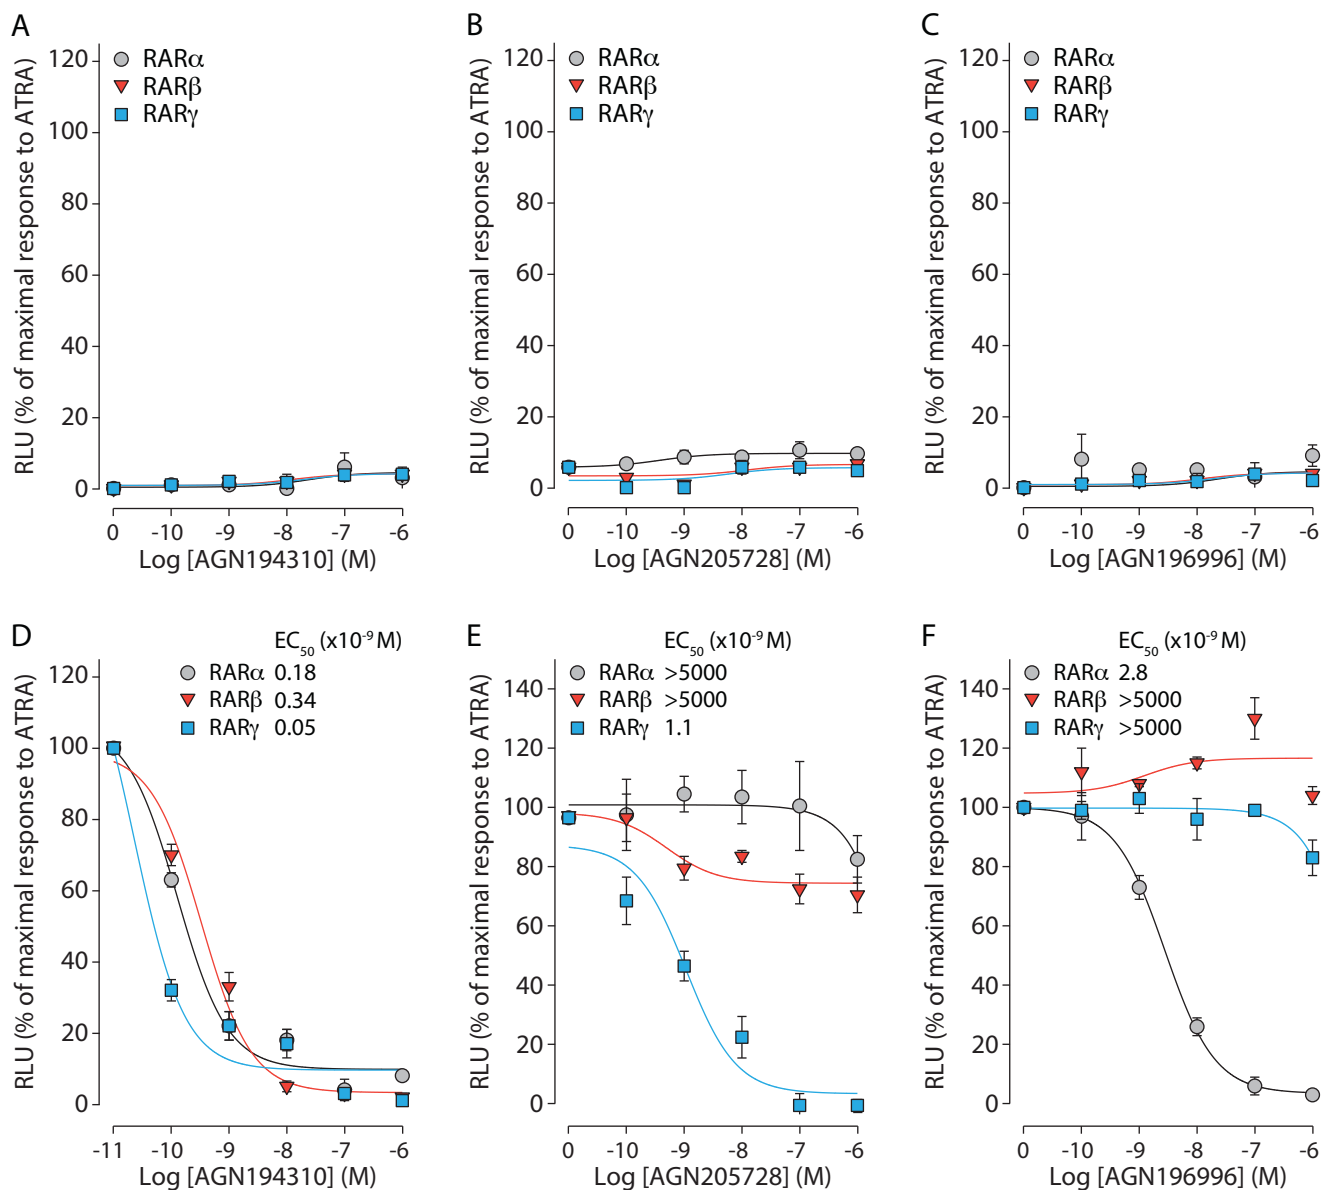

**Figure S1. Modulation of RAR isotype-mediated transactivation by pan-RAR and isotype selective antagonists.**

(A-C) CV-1 cells transfected with ERE-Tk-Luc and ER-DBD/RAR isotype-LBD fusions were assayed as described in Figure 3. RAR isotype-mediated transactivation was evaluated following treatment with the indicated concentrations of (A) AGN194310, (B) AGN205728 or (C) AGN196996. (D-E) Transfected CV-1 cells were stimulated with  $10^{-6}$  M ATRA plus the indicated concentrations of (D) AGN194310, (E) AGN205728 or (F) AGN196996. The compound concentrations at which half-maximal effect is observed ( $EC_{50}$ ) for RAR $\alpha$ , RAR $\beta$  or RAR $\gamma$  are indicated.
